# Supplementary material for: Wedelolactone facilitates the early development of parthenogenetically activated porcine embryos by reducing oxidative stress and inhibiting autophagy
Source: PeerJ. 2022 Jul 25;10:e13766. doi: 10.7717/peerj.13766 (PMC9332323; doi:10.7717/peerj.13766)
Supplement: Supplemental Information 1 [file peerj-10-13766-s001.xlsx]

## Sheet: Sheet1
	RESULT1	blastocyst rate(%)
			0			0.25nM			2.5nM			25nM
		day6	27.6	26.7	27.5	27	25	26.4	33.3	36.7	34.2	28	29	28.8
		day7	37.9	33.3	35.2	30	34	32.8	46.7	43.3	46.2	36	35	36.2
	RESULT2	Cell Number				RESULT3	Proliferation level			RESULT4	Apoptosis level			RESULT5	qPCR-apoptosis，pluripotency
		0nM	2.5nM				0nM	2.5nM			0nM	2.5nM				0nM			2.5nM
		46	56				0.472727	0.478261			0.0652174	0.0408163			CASP3	1.18	0.95	0.89	0.44	0.38	0.52
		40	47				0.576923	0.72			0.05	0.030303			SIRT1	1.03	1.08	0.96	0.59	0.62	0.61
		41	56				0.33871	0.380952			0.0487805	0.0151515			NANOG	1	1.02	1.1	1.94	1.4	1.6
		36	53				0.568182	0.447368			0.0277778	0.0212766			OCT4	1.08	1.08	0.96	1.9	2.31	2
		49	59				0.321429	0.461538			0.0612245	0.0151515			SOX2	1	1.04	0.97	2.13	1.9	2.01
		35	49				0.536585	0.341463			0.0857143	0.030303
		40	43				0.45	0.666667			0.1	0.015873
		37	40				0.55814	0.444444			0.0540541	0.0253165
		42	47				0.641509	0.772727			0.0714286	0.030303
		37	37				0.454545	0.310345			0.0810811	0.0465116
		34	58				0.413793	0.235294			0.0588235	0.025
		25	57				0.583333	0.43			0.08	0.0212766
		53	50				0.34375	0.820513			0.031746	0.0416667
		52	46				0.346154	0.216216			0.0322581	0.0540541
		43	40				0.448276	0.314815			0.0465116	0.05
		29	38				0.269231	0.529412			0.0689655	0.0327869
		34	38				0.477273	0.535714			0.025974	0.0465116
		45	37				0.263158	0.615385			0.028169	0.0392157
		40	51				0.533333	0.65			0.0285714	0.0206186
		48	40				0.37037	0.625			0.031746	0.0327869
		53	61				0.5	0.85			0.04	0.0555556
		50	43				0.458333	0.454545			0.04	0.0540541
		50	51				0.387097	0.633333			0.0408163	0.0298507
		49	37				0.653061	0.56			0.0416667	0.0350877
		48	41				0.318841	0.513514			0.0425532	0.04
		47	58				0.57	0.611111			0.0425532	0.0434783
		47	59				0.510638	0.591837			0.0434783	0.05
		46	56				0.581818	0.59375			0.0465116	0.0526316
		43	56				0.5	0.514286			0.0465116	0.0526316
		43	53				0.428571	0.538462			0.05	0.027027
		40	54				0.505257	0.5625			0.0512821	0.03125
		39	51				0.505257	0.647059			0.0526316	0.0967742
		38	50				0.505257	0.647059			0.0571429	0.0909091
		35	45				0.42	0.428571			0.0588235	0.0810811
		40	40				0.31	0.659091			0.11	0.0833333
		28	39				0.41	0.645833			0.147059	0.1
		28	37				0.29	0.510638			0.0666667	0.0857143
		27	37				0.56	0.581818			0.133333	0.0810811
		39	35				0.31	0.5			0.119048	0.0731707
		36	40				0.45	0.642857			0.1	0.0384615
		35	33				0.56	0.612903			0.0833333	0.0508475
		31	31					0.6			0.142857	0.0535714
		25	33					0.619048			0.105263	0.0535714
		22	50					0.853659			0.107143	0.0566038
		27	32					0.642857			0.117647	0.0555556
		26	35					0.612903			0.133333	0.0588235
		24	34					0.6			0.07	0.06
		21	31					0.653061			0.0952381	0.0666667
		45	40					0.765957			0.08	0.025
		32	26					0.659091			0.06	0.025641
		38	29					0.645833			0.0909091	0.0540541
		35	36					0.647059			0.0714286	0.0666667
		35	35			n	41	52			0.08	0.0363636
		27	35			R	4				0.106383	0.0465116
		28	60								0.0961538	0.0625
		29	34								0.0588235	0.0588235
		32	22								0.0909091	0.0526316
		23	24								0.111111	0.0277778
		19	26								0.0454545	0.031746
		23	31								0.0666667	0.0425532
		22	37								0.05	0.0434783
		28	34								0.1	0.0526316
		20	30								0.0689655	0.031746
		28	25								0.115385	0.0363636
		39	35								0.057971	0.0363636
		27	54								0.056338	0.0384615
		36	55								0.0454545	0.0392157
		22	39								0.0625	0.0416667
		32	30								0.1	0.0444444
		39	36								0.0789474	0.0606061
		29	34								0.111111	0.0666667
		42	56								0.111111	0.03125
		33	44								0.0952381	0.0277778
		40	37								0.105263	0.0246914
		41	46								0.0689655	0.03125
		21	31								0.0555556	0.0333333
		21	34								0.0714286	0.02
		23	36								0.0666667	0.02
		28	37								0.05	0.0208333
		28	33								0.111111	0.0222222
		33	31								0.0606061	0.0227273
		30	37								0.0952381	0.0238095
		27	45								0.0681818	0.0285714
		30	40								0.130435	0.037037
		26	33								0.0612245	0.0263158
		24	33								0.130435	0.0434783
			33								0.111111	0.047619
			38								0.0392157	0.0454545
			35								0.0526316	0.025
			30								0.0833333	0.0416667
	n	86	90								0.0740741	0.0434783
											0.0555556	0.0540541
											0.105263	0.0588235
											0.0454545	0.025641
											0.0465116	0.0588235
											0.105263	0.0588235
												0.0444444
												0.0434783
												0.04
												0.0689655
												0.0588235
										n	96	102
