# Supplementary material for: Wedelolactone facilitates the early development of parthenogenetically activated porcine embryos by reducing oxidative stress and inhibiting autophagy
Source: PeerJ. 2022 Jul 25;10:e13766. doi: 10.7717/peerj.13766 (PMC9332323; doi:10.7717/peerj.13766)
Supplement: Supplemental Information 2 [file peerj-10-13766-s002.xlsx]

## Sheet: Sheet1
	RESULT6	DCFH-ROS			RESULT7	DMF2HC-GSH			RESULT8	qPCR-antioxidative
		0nM	2.5nM			0nM	2.5nM				0nM			2.5nM
		1.29454	0.735294			0.968632	0.943921			GPX1	0.9	0.98	1.1	7.62	6	6.8
		0.863774	0.933619			0.812964	1.17218			NOX2	1.08	1.14	1.03	2.69	3.87	3
		1.00472	0.891628			0.758551	1.32833			SOD1	1.07	1.01	1.12	5.04	3.08	4.97
		1.1148	0.726115			0.848939	1.17133
		1.12714	0.862135			1.19582	0.720973
		0.865506	0.895154			0.728937	1.39733			RESULT9	LC3			RESUL10	qPCR-antophagy
		1.56663	0.572257			0.81831	1.1662				0nM	2.5nM				0nM			2.5nM
		1.02142	0.891588			1.09165	1.09716				1.2	0.7			ATG5	1.02	0.92	0.97	0.62	0.76	0.67
		0.98531	0.900098			0.66035	1.39396				0.9	0.6			LC3	1	0.91	0.99	0.48	0.64	0.35
		1.06002	0.881319			0.70982	1.40537				0.99	0.75			BECLIN1	0.98	0.93	1.01	0.61	0.8	0.72
		0.887683	0.898331			0.940626	1.20283				1.11167	1.14937
		1.23012	0.907676			0.837592	1.2952				1.14965	1.03		RESUL11	Mitochondria			RESUL12	NRF2 pathway			RESUL13	qPCR-antophagy
		1.13549	0.926932			1.00232	1.11158				1.17467	0.641333			0nM	2.5nM			0nM	2.5nM				0nM			2.5nM
		1.07249	0.899151			0.961277	1.04239				1.15969	0.852478			1.39863	1.06055			0.710357	0.858046			Keap1	0.85	0.92	0.9	0.95	1.14	2.09
		1.11585	0.841899			0.784067	1.2604				0.935791	1.04264			0.829159	1.32477			0.510149	0.882176			Nrf2	1.04	1.07	0.99	1.33	1.5	1.27
		1.1282	0.799415			0.816858	1.11928				1.02306	0.363833			0.681101	1.3694			0.384174	0.933237			UCHL1	0.89	1.08	1.1	2.68	3.24	2.44
		1.01247	0.928859			0.803957	1.10162				0.652983	0.528821			1.08987	1.42536			0.984445	0.820331			HO-1	1.06	1.02	0.97	2.99	3.99	3.11
		1.05561	0.539022			1.03889	1.03905				0.67253	0.630535			1.05588	0.894829			0.816774	0.889254			NQO1	0.89	0.99	1.05	1.18	2	1.48
		1.02748	0.881916			0.899266	1.13497				1.13729	0.75			0.69871	1.14855			1.77764	0.942841
		1.13766	0.86719			0.864256	1.10985				1.57965	0.665293			1.07512	1.12002			1.11422	0.900315
		1.4562	0.730135			0.869965	1.2909				1.09172	0.73			1.31623	0.96756			1.61698	1.04743
		1.67492	0.681601			0.649318	1.38428				0.859375	0.831043			1.34447	0.929301			1.40202	1.0707
		1.59918	0.715496			0.690088	1.3796				0.95	0.63			0.77	1			0.893162	1.40213
		1.62435	0.759485			0.71273	1.22479				1.1	1.14			0.74	0.91			1.77165	0.901439
		1.10536	0.972131			0.720415	1.28352				1.2	1.14			0.77	0.77			0.353372	1.25496
		1.41181	0.77133			0.623335	1.39504				0.9	0.683562			0.85	0.82			0.440378	1.48768
		1.50951	0.717144			0.719146	1.50392				0.99	0.816043			0.8	1.18			0.432821	0.664697
		1.41491	0.709231			0.75497	1.32866				1.11167	0.760019			0.83	0.72			0.465448	1.11779
		1.42291	0.730207			0.603065	1.47682				1.14965	0.83558			0.62	0.97			1.08648	1.44634
		1.54626	0.710425			0.774027	1.40046				1.17467	0.8			0.6	1.39			1.78732	0.902434
		1.61503	0.83513			0.884769	1.33102				1.15969	0.7			0.72	0.8			0.969975	1.31898
		1.53032	0.659097			0.864659	1.36274				0.935791	0.6			1.03593	0.95			1.25975	0.786635
		1.6956	0.617695			0.7733	1.27038				1.02306	0.75			1.06902	1.53			0.779741	1.63226
		1.24665	0.911274			0.719999	1.27038				0.652983	1.14937			1.04481	0.79			1.25477	1.39129
		1.03797	0.954101			0.668553	1.37897				0.67253	1.03			1.01818	0.77			0.970897	0.889531
		1.28875	0.83409			0.749779	1.53905				1.13729	0.641333			1.06744	0.96			1.15615	1.15827
		1.18001	0.81848			0.776222	1.48579				1.57965	0.852478			0.99907	0.883063			0.811815	1.56405
		1.28116	0.772827			0.794664	1.40546				1.09172	1.04264			1.0485	0.973715			0.482223	1.85575
		1.24366	0.872706			0.732274	1.5089				0.859375	0.363833			1.07269	0.972071			0.788662	1.0848
		1.18011	0.785331			0.770484	1.38925				0.95	0.528821			0.859097	0.975095			0.53286	0.904868
		1.24889	0.788565			0.694715	1.38925				1.1	0.630535			1.19935	0.940183			0.602889	1.13296
		1.42383	0.763696			0.607485	1.46703					0.75			1.02776	0.932615			0.605174	1.34805
		1.23826	0.788358			0.689493	1.30063					0.665293			0.939077	0.972132			0.777031	1.15123
		1.265	0.875206			0.571552	1.45795					0.73			0.946245	0.976929			0.895338	1.01106
		1.21439	0.788644			0.743252	1.38368					0.831043			0.958875	0.94092			0.741786	0.777289
		1.22273	0.82535			0.694771	1.31043					0.63			0.925233	0.97677			0.75198	0.96238
		1.2002	0.8209			0.876322	1.35525					1.14			0.867199	0.920894			0.495624	1.63744
		1.23386	0.788724			0.974193	1.49985					1.14			0.908398	0.962824			0.593008	0.819981
		1.42652	0.756843			1.12907	1.10516					0.683562			0.917748	0.990328			1.31339	0.983192
		1.14678	0.860551			1.22108	1.24793					0.816043			0.872236	0.941471			1.10633	0.828645
		1.17053	0.951401			1.22108	1.2111					0.760019			0.936472	0.96647			1.56188	1.00021
		1.26386	0.939939			0.735301	1.21476					0.83558			0.9444	0.966565			0.84177	0.829253
		1.22144	0.881846			1.21436	1.14433					0.8			1.0664	0.967669			0.633562	0.897144
		1.03682	0.900401			1.21073	1.23328								0.935892	1.00205			0.701361	1.23476
		1.12683	0.973586			0.722026	1.21566								0.897347	0.902564			0.421465	1.62619
		1.10933	0.967768			1.15542	1.11976								0.874824	0.900517			0.413465	1.4882
		1.07854	0.931005			0.982029	1.20604								0.903733	0.90232			1.41478	1.34119
		1.05665	0.904944			1.07264	1.34356								0.964968	1.41652			0.703094	1.58652
		1.15297	0.946249			1.18606	1.23084								1.02695	1.43338			0.815207	1.22452
		1.09052	0.932128			0.874857	1.19936								1.03807	1.39896			0.839963	0.943615
		1.01465	0.932128			0.8225	1.08567								1.04429	1.34123			0.749233	1.03062
		1.06283	0.932128			0.938521	1.17264								1.04095	1.29347			1.4806	1.03042
		1.05749	0.932128			1.03279	1.14143								1.00781	1.55814			0.420747	0.980021
		1.06538	0.932128			0.921493	1.18257								1.04159	1.46395			1.37354	0.931983
		1.13614	0.872767			0.476547	1.01535								1.02886	1.47375			1.56776	0.897992
		1.07985	0.933621			0.744559	1.10704								1.06163	1.44954			1.80959	0.986473
		1.05679	0.985889			0.797237	1.10704								1.07459	1.46245			1.48274	1.96299
		0.99275	0.962675			0.785234	1.21939								1.06064	1.30503			1.47662	0.985386
		0.63107	0.934374			1.26466	0.992671								0.861259	1.33053			1.64457	1.96878
		1.03649	0.810247			1.14068	1.24039								0.866213	1.29431			1.73619	1.43837
		1.03649	0.771832			1.09855	1.24039								0.935315	1.26355			1.49043	1.48689
		1.12137	0.924282			1.07991	1.40375								0.940917	1.29758			1.6183	1.16876
		1.02943	0.918507			1.01145	1.23681								0.935417	1.53			1.36635	1.91353
		1.07325	1.03649			1.12939	1.23681									1.54168				2.19155
		0.973832	1.03649			1.09831	0.716528									1.4065				1.70253
		1.03853	1.12137			1.19687	0.716528									1.2718				1.15048
		1.13199	1.02943			1.06857	1.48787									1.23756				1.51388
		1.13199	1.07325			1.0424	1.4867									1.25726				1.04815
		0.995373	1.03516			0.810785	1.27642									1.24828				1.37044
		1.03516	1.08748			0.990031	1.39086									1.27096				1.11562
		1.08748	1.13626			0.990031	1.1696													0.784533
		1.13626				0.956502	0.90905													1.17813
		0.830969				1.07678	0.968305													1.86684
						1.10681	0.90905													0.979855
						1.11992	0.926414													2.13369
						0.931768	1.05518													2.15074
						0.892726	0.848514													2.13555
						0.97313	0.947356													1.98377
						0.777168	0.93204													2.19649
							0.866239													1.13966
							0.915707													1.26307
							0.917508													2.38619
